# Supplementary material for: Dual Activity BLEG-1 from Bacillus lehensis G1 Revealed Structural Resemblance to B3 Metallo-β-Lactamase and Glyoxalase II: An Insight into Its Enzyme Promiscuity and Evolutionary Divergence
Source: MDPI journal article supplement (doi:10.3390/ijms22179377), 2021-08-29
Supplement: s1 [file s1]

## Supplementary materials

**Table S1.** Representative enzymes from each family of the metallo-hydrolase-like MBL-fold protein superfamily reported by Daiyasu et al (2001) [1], Bebrone (2007) [5], and Palzkill (2013) [11].

| Member of Metallo-hydrolase-Like MBL-Fold Protein Superfamily | Protein Name | Organism                                                                     | Accession                |        |
|---------------------------------------------------------------|--------------|------------------------------------------------------------------------------|--------------------------|--------|
|                                                               |              |                                                                              | Genbank Accession Number | PDB ID |
| B1 MBL                                                        | BcII         | <i>Bacillus cereus</i>                                                       | -                        | 1BMC   |
|                                                               | CcrA         | <i>Bacteroides fragilis</i>                                                  | -                        | 1ZNB   |
|                                                               | IMP-1        | <i>Pseudomonas aeruginosa</i>                                                | -                        | 1DD6   |
|                                                               | BlaB         | <i>Chryseobacterium meningoseptica</i>                                       | -                        | 1M2X   |
|                                                               | SPM-1        | <i>Pseudomonas aeruginosa</i>                                                | -                        | 2FHX   |
|                                                               | NDM-1        | <i>Klebsiella pneumonia</i>                                                  | -                        | 3ZR9   |
|                                                               | VIM-1        | <i>Pseudomonas aeruginosa</i>                                                | -                        | 5N5G   |
|                                                               | GIM-1        | <i>Pseudomonas aeruginosa</i>                                                | -                        | 2YNT   |
|                                                               | DIM-1        | <i>Pseudomonas stutzeri</i>                                                  | -                        | 4WD6   |
|                                                               | TMB-1        | <i>Achromobacter xylobacter</i>                                              | -                        | 5MMD   |
| B2 MBL                                                        | CphA         | <i>Aeromonas hydrophila</i>                                                  | -                        | 1X8G   |
|                                                               | Sfh-1        | <i>Serratia fonticola</i>                                                    | -                        | 3SD9   |
| B3 MBL                                                        | L1           | <i>Stenotrophomonas maltophilia</i>                                          | -                        | 1SML   |
|                                                               | FEZ-1        | <i>Legionella gormannii</i>                                                  | -                        | 1K07   |
|                                                               | BJP-1        | <i>Bradyrhizobium japonicum</i>                                              | -                        | 3LVZ   |
|                                                               | AIM-1        | <i>Pseudomonas aeruginosa</i>                                                | -                        | 4AWY   |
|                                                               | SMB-1        | <i>Serratia marcescens</i>                                                   | -                        | 3VPE   |
|                                                               | GOB-18       | <i>Elizabethkingia meningoseptica</i>                                        | -                        | 5K0W   |
| Glyoxalase II (GLXII)                                         | GloB         | <i>Salmonella enterica</i> subsp. <i>enterica</i> serovar <i>typhimurium</i> | -                        | 2QED   |
|                                                               | YcbL         | <i>Salmonella enterica</i>                                                   | -                        | 2XF4   |
| N-acyl-L-homoserine lactonase (AHL)                           | AiiA         | <i>Bacillus thuringiensis</i>                                                | -                        | 2A7M   |
| Flavodiiron proteins                                          | ROO          | <i>Desulfovibrio gigas</i>                                                   | -                        | 1E5D   |
| Cleavage and polyadenylation specificity factors              | CPSF-73      | <i>Homo sapiens</i>                                                          | -                        | 2I7V   |
| Arylsulfatase                                                 | SdsA1        | <i>Pseudomonas aeruginosa</i>                                                | -                        | 2CG3   |
| 5'-exonuclease                                                | Exo1         | <i>Homo sapiens</i>                                                          | NP_666226.1              | -      |
| Ribonuclease                                                  | Tm           | <i>Thermotoga maritima</i>                                                   | -                        | 1WW1   |

| Member of Metallo-hydrolase-Like MBL-Fold Protein Superfamily | Protein Name | Organism                        | Accession                |        |
|---------------------------------------------------------------|--------------|---------------------------------|--------------------------|--------|
|                                                               |              |                                 | Genbank Accession Number | PDB ID |
| Cyclic nucleotide phosphodiesterase                           | ZipD         | <i>Escherichia coli</i>         | -                        | 2CBN   |
| Insecticide hydrolase                                         | MPH          | <i>Pseudomonas</i> sp WBC-3     | -                        | 4LE6   |
| Proteins required for natural transformation competence       | ComA         | <i>Neisseria gonorrhoeae</i>    | P51973                   | -      |
| Choline-binding protein                                       | CbpE         | <i>Streptococcus pneumoniae</i> | -                        | 1WRA   |

**Table S2.** Comparison of enzyme kinetics data of several B3 MBLs and GLXIIs towards ampicillin and SLG respectively.

| B3 MBL                        | $K_M$ (mM)            | $k_{cat}$ (s <sup>-1</sup> ) | $k_{cat}/K_M$ (mM <sup>-1</sup> s <sup>-1</sup> ) |
|-------------------------------|-----------------------|------------------------------|---------------------------------------------------|
| L1 [57]                       | $3.0 \times 10^{-1}$  | 580                          | $1.9 \times 10^3$                                 |
| AIM-1 [58]                    | $4.1 \times 10^{-2}$  | 594                          | $1.4 \times 10^3$                                 |
| FEZ-1 [59]                    | > 5                   | > 5.5                        | $1.1 \times 10$                                   |
| GLXII                         | $K_M$ (mM)            | $k_{cat}$ (s <sup>-1</sup> ) | $k_{cat}/K_M$ (mM <sup>-1</sup> s <sup>-1</sup> ) |
| GloB [26]                     | $2.95 \times 10^{-1}$ | 209.9                        | $7.1 \times 10^2$                                 |
| YcbL [35]                     | $5.0 \times 10^{-1}$  | 0.9                          | 1.8                                               |
| <i>A. thaliana</i> GLXII [25] | $3.91 \times 10^{-1}$ | 129                          | $3.3 \times 10^2$                                 |

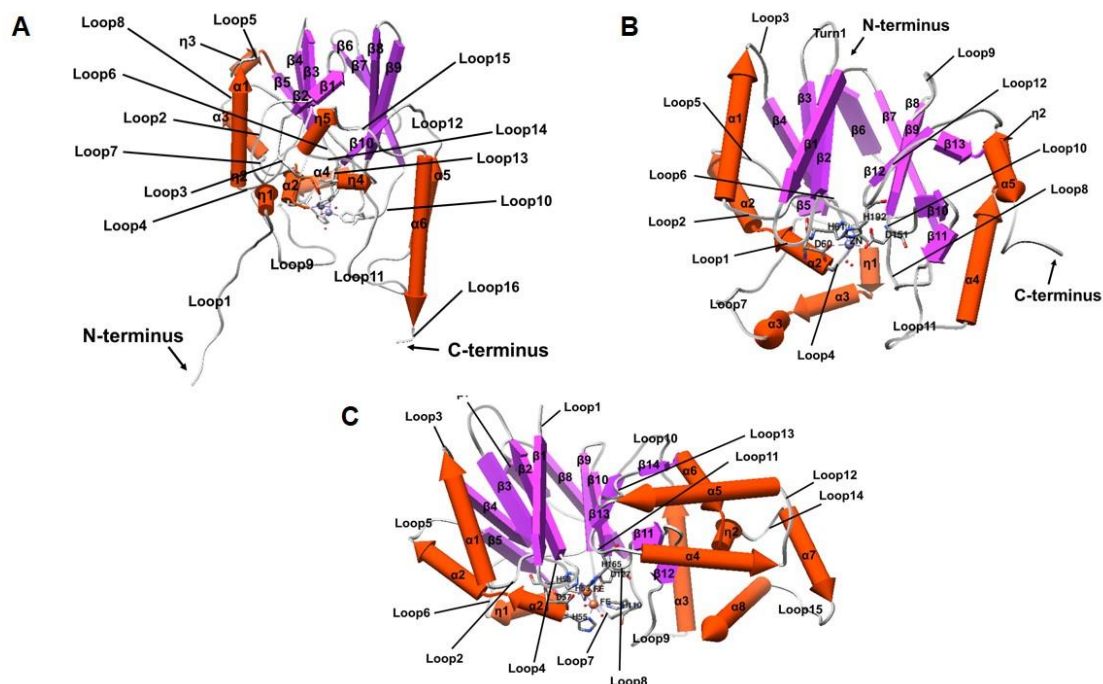

**Figure S1.** Crystal structure of (A) L1 MBL (PDB ID: 1SML, chain A), (B) YcbL (PDB ID: 2XF4, chain A) and (C) GloB (PDB ID: 2QED, chain A) with labelled secondary structure elements.
